# Supplementary material for: Palladium-atom catalyzed formic acid decomposition and the switch of reaction mechanism with temperature
Source: Royal Society of Chemistry journal article supplement (doi:10.1039/c6cp00186f), 2016-01-01
Supplement: c6cp00186f1.pdf [file c6cp00186f1.pdf]

### Support Information for

Palladium-Atom Catalyzed Formic Acid Decomposition and the Switch of Reaction Mechanism with Temperature  
Nan He<sup>a</sup> and Zhen Hua Li<sup>\*a</sup>

*Collaborative Innovation Center of Chemistry for Energy Material, Shanghai Key Laboratory of Molecular Catalysis  
& Innovative Materials, Department of Chemistry, Fudan University, Shanghai 200433, China*

#### List of supporting materials:

|                                                                                                           |   |
|-----------------------------------------------------------------------------------------------------------|---|
| Table S1 $T_1$ -diagnostic values of some important structures.....                                       | 2 |
| Table S2 Energy barriers of twelve elementary steps calculated by different methods.....                  | 3 |
| Figure S1 Free-energy profiles at 298 K for the interconversion among I1.41a, I141b, and I141c.....       | 4 |
| Figure S2 Geometries of the intermediates and transition states for the PdCO catalyzed FAD reactions..... | 4 |
| Figure S3 Free-energy profiles of all PdCO catalyzed FAD pathways at room temperature.....                | 5 |
| Figure S4 Free-energy profiles of the four low-energy pathways for the PdCO catalyzed FAD at 600 K.....   | 5 |
| Figure S5 Free-energy profiles of the four low-energy pathways for the PdCO catalyzed FAD at 900 K.....   | 6 |
| Cartesian coordinates for all optimized structures.....                                                   | 6 |

**Multireference character.**

$T_1$ -diagnostic value is a factor to indicate how strong the multireference character is for the wavefunction of a certain structure (see ref. 68, ref. 69 and ref. 70). If the multireference effects are strong, then the results of single-reference WFT methods would be doubtful. It is recommended that the  $T_1$ -diagnostic value should be less than 0.05 (ref. 68) or 0.04 (ref. 69) to ignore multireference effects. The results show that all  $T_1$ -diagnostic values are small enough in this work to use CCSD(T) as a standard.

Table S1  $T_1$ -diagnostic values of some important structures. (CCSD/aug-cc-pVDZ)

| <b>Structure</b> | <b><math>T_1</math>-diagnostics</b> |
|------------------|-------------------------------------|
| I1.11            | 0.033                               |
| I1.12            | 0.030                               |
| I1.31            | 0.026                               |
| I1.32            | 0.034                               |
| I1.13            | 0.028                               |
| I1.41            | 0.028                               |
| TS1.12           | 0.028                               |
| TS1.21           | 0.031                               |
| TS1.31           | 0.030                               |
| TS1.32           | 0.035                               |
| TS1.33           | 0.025                               |
| TS1.11           | 0.028                               |
| TS1.42           | 0.027                               |

### Energy barriers of twelve elementary steps.

Table S2 Potential-energy barriers of twelve elementary steps calculated with different methods. “-” denotes that a different step was obtained by that DFT method from that of the mPW2PLYP method so that a comparison on energy barrier of that step does not make sense. So they would not be used in error estimations (for example, calculating MUE for BLYP would use 10 barriers without EB4 and EB5).

| DFT               | EB1    | EB2    | EB3    | EB4    | EB5    | EB6    | EB7    | EB8    | EB9    | EB10    | EB11    | EB12    |
|-------------------|--------|--------|--------|--------|--------|--------|--------|--------|--------|---------|---------|---------|
|                   | I1.11- | I1.12- | I1.12- | I1.21- | I1.21- | I1.31- | I1.32- | I1.33- | I1.31- | I1.41b- | I1.41b- | I1.41b- |
| Methods           | TS1.1  | TS1.12 | TS1.12 | TS1.21 | TS1.21 | TS1.3  | TS1.3  | TS1.3  | TS1.4  | TS1.41  | TS1.41  | TS1.41  |
|                   | 1      | a      | b      | a      | b      | 1      | 2      | 3      | 0      | a       | b       | c       |
| <b>B2PLYP</b>     | 27.97  | 22.70  | 22.20  | 34.37  | 1.53   | 20.90  | 7.66   | 8.84   | 7.32   | 17.20   | 22.05   | 31.69   |
| <b>B97D3</b>      | 24.33  | 19.89  | 22.82  | -      | -      | 15.13  | 6.02   | 8.83   | 3.56   | 18.18   | 20.92   | 31.02   |
| <b>BLYP</b>       | 20.41  | 22.64  | 23.76  | -      | -      | 12.97  | 6.74   | 9.31   | 4.41   | 15.41   | 21.88   | 30.03   |
| <b>BPW91</b>      | 21.57  | 21.35  | -      | -      | -      | 14.79  | 6.82   | 8.98   | 3.06   | 17.11   | 20.10   | 30.61   |
| <b>OLYP</b>       | 22.16  | 20.48  | 24.35  | 27.84  | 0.01   | 17.22  | 6.16   | 9.00   | 3.54   | 20.48   | 21.21   | 32.07   |
| <b>HCTH-407</b>   | 24.71  | 19.57  | 23.96  | 28.76  | 0.27   | 18.65  | 5.93   | 8.59   | 3.84   | 22.05   | 21.30   | 32.90   |
| <b>PBE</b>        | 22.33  | 21.07  | -      | -      | -      | 15.32  | 7.03   | 8.72   | 2.75   | 17.82   | 19.68   | 30.30   |
| <b>B3LYP</b>      | 24.93  | 24.35  | 21.93  | 32.61  | 1.92   | 21.28  | 7.27   | 10.30  | 7.15   | 18.87   | 24.47   | 34.21   |
| <b>B3PW91</b>     | 25.30  | 23.18  | 21.16  | 32.75  | 0.73   | 22.59  | 7.35   | 9.98   | 5.72   | 20.28   | 23.09   | 34.46   |
| <b>B3LYP-GD3</b>  | 25.25  | 24.62  | 22.00  | 33.03  | 1.94   | 21.40  | 6.87   | 10.49  | 6.82   | 18.99   | 24.85   | 34.05   |
| <b>B3PW91-GD3</b> | 25.31  | 23.50  | 21.16  | 33.02  | 0.70   | 22.67  | 6.90   | 10.21  | 5.33   | 20.43   | 23.54   | 34.27   |
| <b>SOGGA-11x</b>  | 31.09  | 25.09  | 20.07  | 42.04  | 5.71   | 30.22  | 8.00   | 10.67  | 10.51  | 21.63   | 25.09   | 36.81   |
| <b>LC-wPBE</b>    | 25.78  | 28.50  | 19.47  | 41.47  | 2.58   | 28.75  | 10.02  | 11.75  | 7.84   | 18.42   | 24.17   | 36.85   |
| <b>wB97</b>       | 28.32  | 28.63  | 19.54  | 43.29  | 4.61   | 28.74  | 10.23  | 11.29  | 9.46   | 17.47   | 25.19   | 36.84   |
| <b>N12SX</b>      | 22.19  | 26.91  | 23.70  | -      | 0.52   | 23.84  | 8.13   | 11.66  | 6.21   | 21.21   | 25.36   | 35.90   |
| <b>M06L</b>       | 25.44  | 19.55  | 18.50  | 31.38  | 1.15   | 18.99  | 6.36   | 9.18   | 6.95   | 16.50   | 19.72   | 34.47   |
| <b>M11L</b>       | 32.57  | 16.69  | 16.06  | 42.01  | 9.70   | 28.90  | 5.34   | 10.22  | 14.93  | 18.84   | 19.11   | 34.73   |
| <b>MN12L</b>      | 6.76   | 42.38  | 17.74  | -      | -      | 18.99  | 11.99  | 20.20  | 9.83   | 13.37   | 34.79   | 43.79   |
| <b>TPSS</b>       | 18.45  | 24.24  | -      | -      | -      | 14.52  | 7.81   | 10.04  | 5.94   | 13.70   | 19.57   | 30.99   |
| <b>rev-TPSS</b>   | 16.68  | 26.12  | -      | -      | -      | 14.82  | 8.89   | 10.68  | 6.90   | 13.01   | 19.15   | 32.68   |
| <b>tHCTHhyb</b>   | 22.22  | 23.79  | 21.40  | 30.38  | 0.24   | 19.87  | 7.46   | 10.20  | 3.78   | 18.85   | 23.46   | 33.94   |
| <b>MN12SX</b>     | 19.26  | 31.15  | 19.72  | 29.37  | 0.74   | 24.70  | 8.00   | 14.65  | 4.66   | 18.22   | 30.47   | 39.15   |
| <b>M11</b>        | 27.23  | 24.32  | 18.59  | -      | -      | 28.14  | 8.40   | 11.47  | 8.34   | 19.34   | 26.26   | 36.87   |
| <b>MPW2PLYP</b>   | 28.06  | 23.97  | 22.00  | 35.57  | 1.66   | 22.20  | 7.99   | 9.38   | 7.54   | 19.36   | 24.92   | 36.49   |
| <b>CC/CBS</b>     | 27.47  | 25.61  | 21.81  | 36.16  | 0.66   | 22.42  | 8.66   | 9.76   | 5.83   | 18.79   | 25.79   | 36.73   |

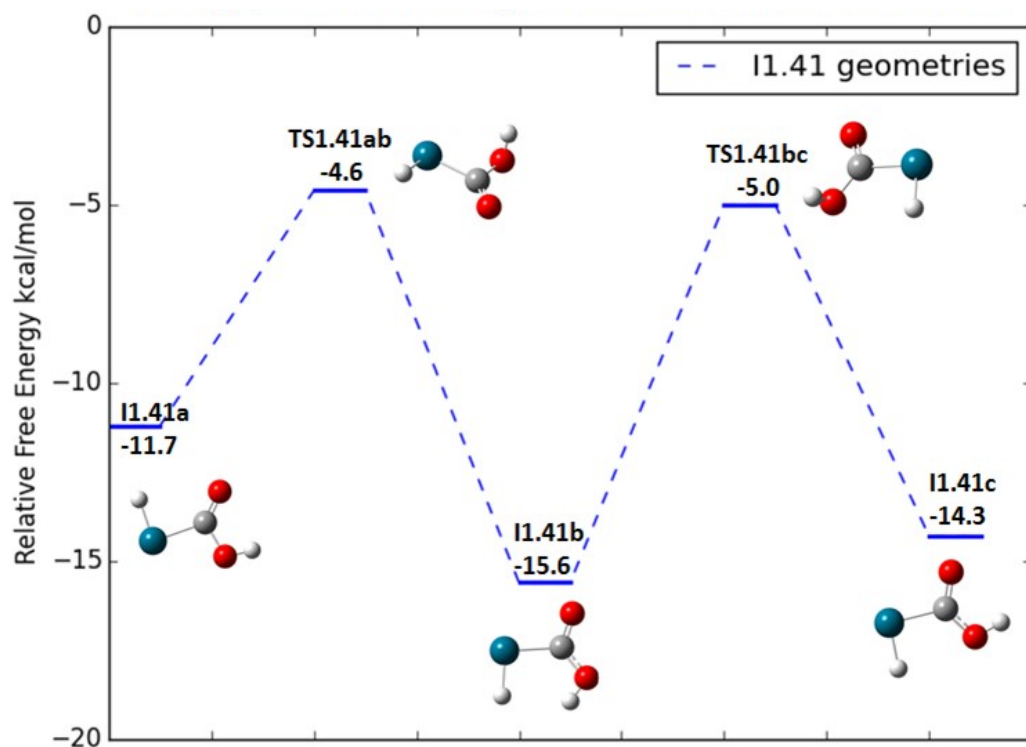

Figure S1 Free-energy profiles for the inter-conversion among three I1.41 intermediates.

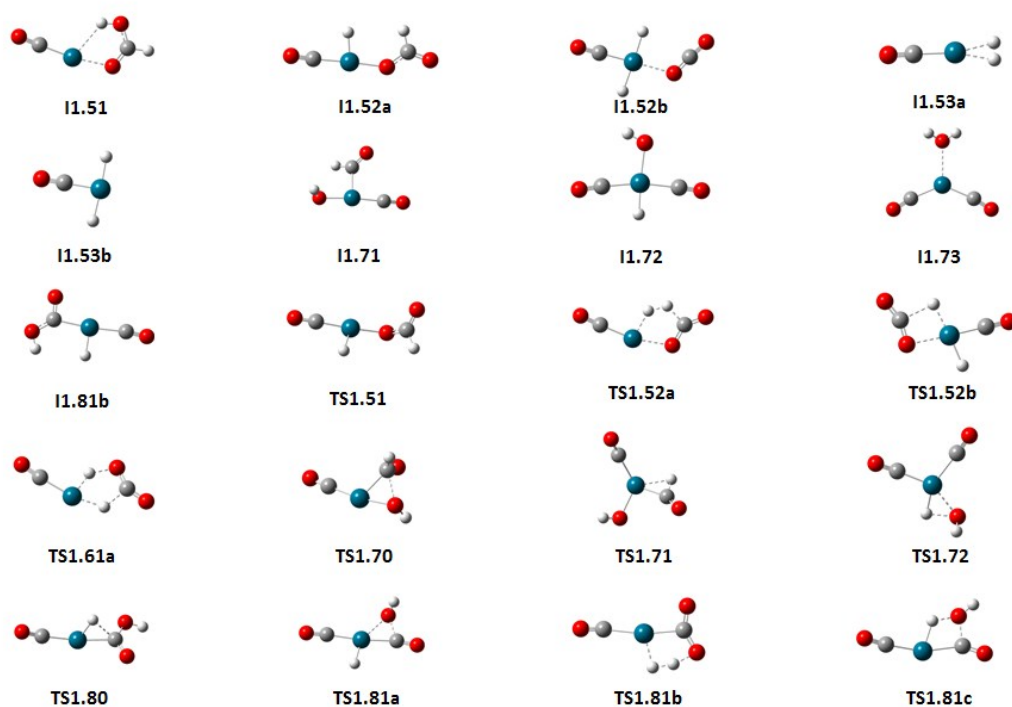

Figure S2 Geometries of ISs and TSs in PdCO catalyzed FAD reaction routes

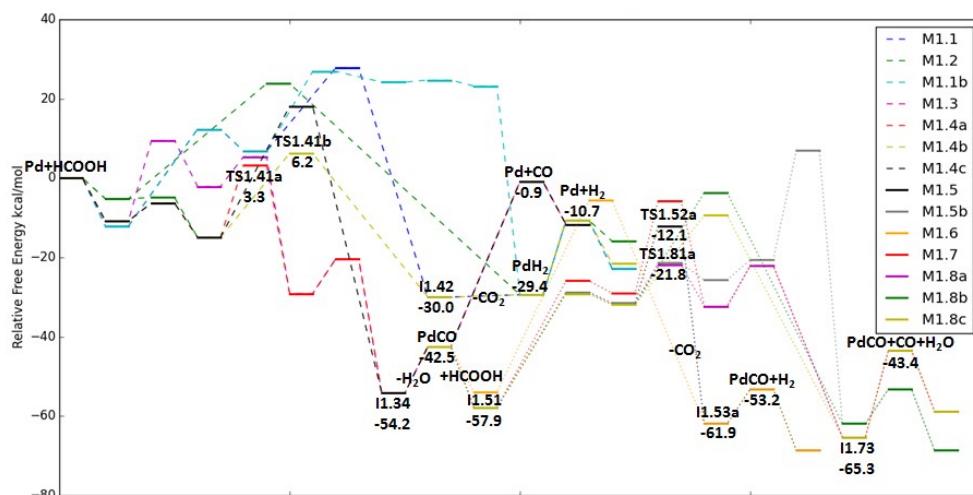

Figure S3 Free-energy profiles of the PdCO catalyzed FAD reaction pathways at room temperature

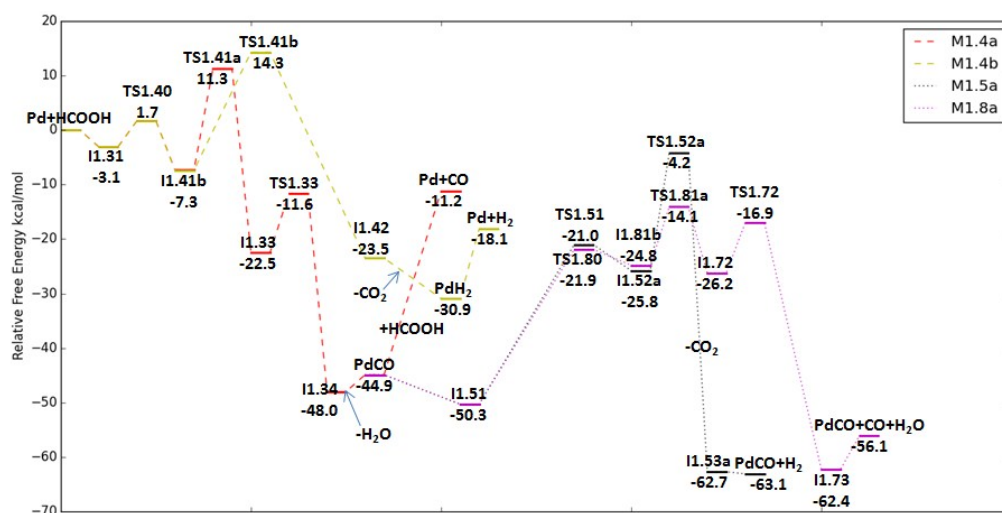

Figure S4 Free-energy profiles of the PdCO catalyzed FAD reaction pathways at 600 K. Only the four low-energy pathways are presented.

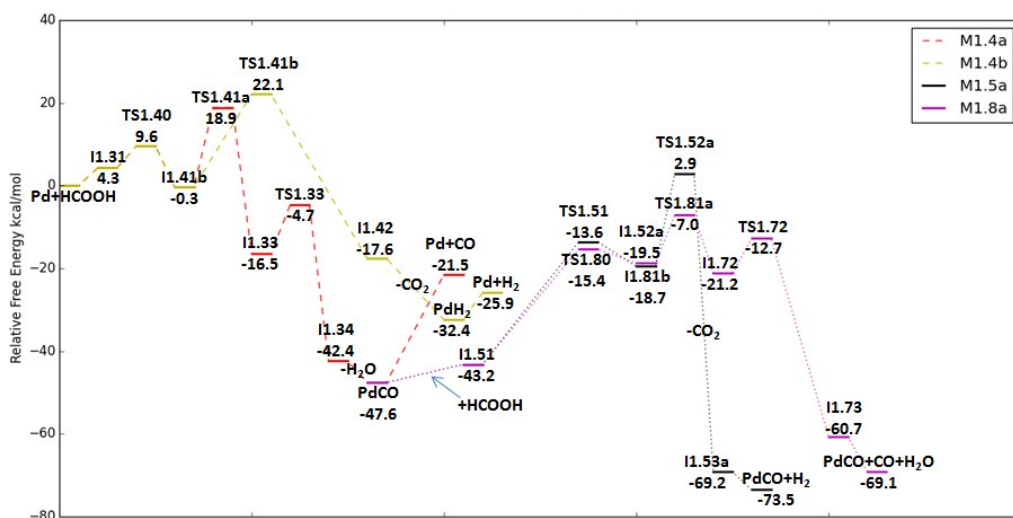

Figure S5 Free-energy profiles of the PdCO catalyzed FAD reaction pathways at 900 K. Only the four low-energy pathways are presented.

### Cartesian coordinates for all optimized structures.

The structures with \* are structures with an open-shell singlet wavefunction.

Vacuum:

l1.11

|    |             |             |             |
|----|-------------|-------------|-------------|
| C  | -1.98207500 | 0.33913000  | 0.00033600  |
| O  | -0.98872100 | 1.04708300  | 0.00024600  |
| H  | -2.98951400 | 0.74720600  | 0.00055700  |
| O  | -1.95569800 | -0.97251100 | 0.00018200  |
| H  | -0.98138200 | -1.21238500 | -0.00000700 |
| Pd | 0.85692800  | -0.04709100 | -0.00013000 |

l1.12

|    |             |             |             |
|----|-------------|-------------|-------------|
| C  | 1.93607000  | 0.33168400  | -0.01835200 |
| O  | 3.06438000  | -0.08085300 | -0.04512400 |
| H  | 1.68374000  | 1.39505600  | -0.10848100 |
| O  | 0.89444800  | -0.48200300 | 0.13165500  |
| H  | -0.74219700 | 1.38580600  | 0.47683400  |
| Pd | -0.96149100 | -0.00582900 | -0.02066300 |

l1.13a

|    |             |             |             |
|----|-------------|-------------|-------------|
| C  | -1.48512000 | 0.03879600  | -0.00001100 |
| O  | -1.06378000 | 1.17469500  | 0.00008000  |
| H  | 1.76086000  | -1.24036800 | -0.42228800 |
| O  | -2.26929200 | -0.82988800 | -0.00004100 |
| H  | 1.75960900  | -1.24132000 | 0.42279300  |
| Pd | 0.69684400  | -0.01107700 | -0.00001600 |

l1.13b\*

|         |             |             |             |
|---------|-------------|-------------|-------------|
| C       | -1.98283600 | 0.17199200  | 0.00005100  |
| O       | -1.07031600 | 0.91158200  | 0.00043300  |
| H       | 0.10899400  | -1.52551100 | 0.00161600  |
| O       | -2.92142500 | -0.49591000 | -0.00033600 |
| H       | 1.68215400  | 1.32227200  | -0.00164200 |
| Pd      | 0.91390900  | -0.09030600 | -0.00002300 |
| l1.14   |             |             |             |
| H       | 0.00000000  | 0.42975400  | -1.54539800 |
| H       | 0.00000000  | -0.42975400 | -1.54539800 |
| Pd      | 0.00000000  | 0.00000000  | 0.06719100  |
| l1.14b* |             |             |             |
| H       | -0.05672074 | 0.00175793  | 1.63771080  |
| H       | -0.05445507 | 0.00170478  | -1.65889836 |
| Pd      | -0.04128895 | 0.00128543  | 0.00476677  |
| l1.21   |             |             |             |
| C       | -1.27951700 | -0.13323400 | 0.22318900  |
| O       | -1.72318900 | -1.20271300 | -0.09386100 |
| H       | -0.52647100 | 0.00767600  | 1.13219700  |
| O       | -1.89035300 | 1.02611900  | -0.13421600 |
| H       | -1.38360600 | 1.76803200  | 0.21298300  |
| Pd      | 0.83685900  | 0.00948800  | -0.01868900 |
| l1.31   |             |             |             |
| C       | 1.29842400  | 0.19438900  | 0.42782500  |
| O       | 0.92218800  | 1.20140500  | -0.21303900 |
| H       | 1.33593900  | 0.15492400  | 1.51679300  |
| O       | 2.11317100  | -0.75061400 | -0.10915400 |
| H       | 2.15998800  | -0.58146100 | -1.05924300 |
| Pd      | -0.77324700 | -0.09448100 | -0.00971600 |
| l1.32   |             |             |             |
| C       | 1.32085500  | 0.79945700  | -0.01585100 |
| O       | 2.16695100  | -0.05231400 | 0.01354900  |
| H       | 1.45938100  | 1.88398100  | -0.05792900 |
| O       | -1.95421800 | 0.53698100  | -0.10547600 |
| H       | -2.20124600 | 0.90766600  | 0.74801900  |
| Pd      | -0.19315500 | -0.24925500 | 0.00305300  |
| l1.33   |             |             |             |
| C       | -1.60491900 | -0.04594300 | 0.00889100  |
| O       | -2.74203900 | -0.00663800 | 0.02712000  |
| H       | 0.06088100  | 1.46080500  | -0.20239200 |
| O       | 2.15673400  | -0.09552200 | -0.04489200 |
| H       | 2.64046000  | 0.44555600  | 0.58369700  |
| Pd      | 0.25240500  | -0.01768300 | -0.00635800 |
| l1.34   |             |             |             |
| C       | 1.64385300  | 0.00000100  | 0.02036300  |

|          |             |             |             |
|----------|-------------|-------------|-------------|
| O        | 2.79009700  | 0.00000400  | 0.05239400  |
| H        | -2.71158400 | -0.77030500 | 0.40153800  |
| O        | -2.33516200 | 0.00000400  | -0.03305800 |
| H        | -2.71157400 | 0.77032400  | 0.40152500  |
| Pd       | -0.17564000 | -0.00000200 | -0.02347700 |
| I1.41b   |             |             |             |
| C        | -1.13924800 | 0.11184600  | 0.00001300  |
| O        | -1.48751200 | 1.25897300  | 0.00002100  |
| O        | -1.96698600 | -0.92833800 | 0.00002100  |
| H        | -1.42732700 | -1.72783900 | 0.00001300  |
| Pd       | 0.76218300  | -0.00104200 | -0.00000900 |
| H        | 0.83839200  | -1.54040600 | -0.00002900 |
| TS1.11   |             |             |             |
| C        | 1.92233800  | -0.25039900 | 0.30095000  |
| O        | 2.74752800  | 0.51319900  | -0.12162300 |
| H        | 2.02697100  | -0.73222500 | 1.28439400  |
| O        | 0.84284800  | -0.66412700 | -0.37631400 |
| H        | -0.42319700 | 1.44295700  | -0.10449700 |
| Pd       | -0.91001800 | 0.04345800  | 0.02169400  |
| TS1.12a  |             |             |             |
| C        | -1.86054200 | -0.07914900 | 0.00022100  |
| O        | -3.03354600 | -0.24598500 | 0.00017700  |
| H        | -1.17923800 | -1.24522100 | 0.00026200  |
| O        | -1.01266200 | 0.83394500  | 0.00019600  |
| H        | -0.14750800 | -1.19708600 | 0.00000400  |
| Pd       | 0.97521000  | -0.03883600 | -0.00010000 |
| TS1.12b* |             |             |             |
| C        | -1.69486500 | 0.09991300  | -0.00018000 |
| O        | -0.95254300 | 1.04819700  | 0.00014900  |
| H        | -0.37037000 | -1.28418700 | 0.00069900  |
| O        | -2.69586600 | -0.48805900 | -0.00002000 |
| H        | 1.85396000  | 1.09424200  | -0.00032900 |
| Pd       | 0.82332300  | -0.10631800 | -0.00000700 |
| TS1.14*  |             |             |             |
| H        | -0.00000000 | 1.61952628  | -0.17550632 |
| H        | -0.00000000 | -1.61952628 | -0.17550632 |
| Pd       | -0.00000000 | 0.00000000  | 0.00763071  |
| TS1.21a  |             |             |             |
| C        | 1.76961600  | -0.01816400 | 0.00003100  |
| O        | 2.62878200  | -0.81970900 | -0.00003500 |
| H        | 0.51959500  | -0.78604700 | 0.00028900  |
| O        | 1.52936300  | 1.19594400  | -0.00000500 |
| H        | 0.10364100  | 1.08437800  | -0.00000900 |
| Pd       | -0.96752400 | -0.06954800 | -0.00000300 |



|         |             |             |             |
|---------|-------------|-------------|-------------|
| TS1.21b |             |             |             |
| O       | 1.84487000  | 1.04370100  | -0.07320600 |
| H       | 1.22433700  | 1.75968300  | 0.10425100  |
| Pd      | -0.81182100 | 0.00255700  | -0.01907800 |
| H       | 0.22337800  | 0.03120900  | 1.19997800  |
| C       | 1.19468900  | -0.13362300 | 0.09228800  |
| O       | 1.74612200  | -1.18205000 | -0.04934000 |
| TS1.31  |             |             |             |
| C       | -1.28440200 | -0.13356400 | 0.41821900  |
| O       | -2.10809100 | -0.56557500 | -0.31445800 |
| H       | -1.41167500 | 0.19569300  | 1.45582900  |
| O       | -0.25890800 | 1.63123200  | 0.01327300  |
| H       | -0.45258800 | 1.86960900  | -0.90126600 |
| Pd      | 0.61971000  | -0.21280800 | -0.01422600 |
| TS1.32  |             |             |             |
| C       | -1.41046200 | 0.10906400  | 0.41803700  |
| O       | -2.25375900 | 0.50258300  | -0.31589200 |
| H       | -1.55450100 | -0.11268000 | 1.49476300  |
| O       | 1.31838100  | 1.32995500  | 0.14292900  |
| H       | 1.07587600  | 1.90059800  | -0.59466000 |
| Pd      | 0.35474300  | -0.36851700 | -0.04390300 |
| TS1.33  |             |             |             |
| C       | -1.62525700 | 0.03554500  | 0.00011300  |
| O       | -2.75096800 | 0.20913400  | 0.00171000  |
| H       | 0.92091900  | 1.25716300  | -0.15267800 |
| O       | 2.18135900  | 0.21431200  | -0.10018300 |
| H       | 2.54131500  | 0.51917500  | 0.73997200  |
| Pd      | 0.23578700  | -0.11689500 | 0.00434400  |
| TS1.40  |             |             |             |
| C       | 1.15761400  | 0.13056900  | 0.08676500  |
| O       | 1.74769300  | 1.16782600  | -0.04578900 |
| O       | 1.75299700  | -1.08323800 | -0.01893400 |
| H       | 2.67965100  | -0.91576300 | -0.25317700 |
| Pd      | -0.82115300 | -0.01100600 | -0.02134600 |
| H       | 0.14217400  | -0.03807400 | 1.23230200  |
| TS1.41a |             |             |             |
| C       | -1.15666400 | -0.36782500 | -0.00007800 |
| O       | -2.25156900 | -0.69086800 | 0.00060900  |
| O       | -0.67735800 | 1.52707200  | -0.11299700 |
| H       | -0.91592000 | 1.85597500  | 0.76243900  |
| Pd      | 0.65352800  | -0.10433900 | 0.00272200  |
| H       | 1.22503100  | -1.53907600 | 0.01193900  |
| TS1.41b |             |             |             |
| C       | 1.24658900  | -0.05835900 | 0.00001700  |

|    |             |             |             |
|----|-------------|-------------|-------------|
| O  | 1.69777300  | -1.16088500 | 0.00002700  |
| O  | 1.60021400  | 1.15525100  | 0.00001600  |
| H  | 0.34529200  | 1.54364300  | -0.00001200 |
| Pd | -0.72843500 | -0.06033800 | -0.00000900 |
| H  | -0.70071000 | 1.62715600  | -0.00003900 |

TS1.41c

|    |             |             |            |
|----|-------------|-------------|------------|
| C  | -0.41928900 | -1.10421600 | 0.00000000 |
| O  | -1.20319000 | -1.96753000 | 0.00000000 |
| O  | 1.15559600  | -1.50385700 | 0.00000000 |
| H  | 1.54705600  | -2.40179300 | 0.00000000 |
| Pd | 0.00000000  | 0.80477300  | 0.00000000 |
| H  | 1.34943300  | -0.22137400 | 0.00000000 |

Aqueous solution:

l1.11

|    |             |             |             |
|----|-------------|-------------|-------------|
| C  | 1.96827500  | 0.32423700  | 0.00000200  |
| O  | 0.98128400  | 1.05134400  | -0.00000300 |
| H  | 2.98062100  | 0.71555600  | 0.00001000  |
| O  | 1.89555100  | -0.98215500 | -0.00000100 |
| H  | 0.89029800  | -1.16978500 | -0.00000700 |
| Pd | -0.84120100 | -0.04445000 | 0.00000000  |

l1.12

|    |             |             |             |
|----|-------------|-------------|-------------|
| C  | 1.93546100  | 0.31124400  | -0.02292200 |
| O  | 3.10232700  | -0.05862500 | -0.05039600 |
| H  | 1.68230800  | 1.37178700  | -0.14038700 |
| O  | 0.93381100  | -0.49450500 | 0.14662200  |
| H  | -0.68191500 | 1.30680800  | 0.60369500  |
| Pd | -0.97613600 | -0.00263100 | -0.02381700 |

l1.13b\*

|    |             |             |             |
|----|-------------|-------------|-------------|
| C  | -2.06989500 | 0.17501700  | -0.00031100 |
| O  | -1.14740300 | 0.89341900  | -0.00036800 |
| H  | 0.19827600  | -1.54097200 | -0.02768800 |
| O  | -3.00143200 | -0.50725900 | 0.00006200  |
| H  | 1.67722400  | 1.36722800  | 0.02798100  |
| Pd | 0.95123700  | -0.08603300 | -0.00045000 |

l1.14

|    |             |             |             |
|----|-------------|-------------|-------------|
| Pd | 0.00000000  | 0.00000000  | 0.06293682  |
| H  | -0.00000000 | 0.48562117  | -1.44754681 |
| H  | -0.00000000 | -0.48562117 | -1.44754681 |

l1.14b\*

|    |             |             |             |
|----|-------------|-------------|-------------|
| H  | 0.00000000  | -0.00000000 | -1.63472365 |
| H  | 0.00000000  | -0.00000000 | 1.63360345  |
| Pd | -0.00000000 | 0.00000000  | 0.00002435  |

l1.21

|   |             |             |            |
|---|-------------|-------------|------------|
| C | -2.27907800 | -0.27862500 | 0.00096400 |
|---|-------------|-------------|------------|

|    |             |             |             |
|----|-------------|-------------|-------------|
| O  | -3.48690800 | -0.26842000 | -0.00108500 |
| H  | -1.68853200 | -1.20164800 | 0.00346500  |
| O  | -1.55406400 | 0.82948400  | 0.00037100  |
| H  | -0.55642400 | 0.58410700  | 0.00128700  |
| Pd | 1.22276500  | -0.04780900 | -0.00010500 |

l1.31

|    |             |             |             |
|----|-------------|-------------|-------------|
| C  | 1.20604800  | 0.18157400  | 0.43306200  |
| O  | 0.91454400  | 1.23968000  | -0.21527000 |
| H  | 1.31375700  | 0.18334900  | 1.51926400  |
| O  | 2.05261700  | -0.76680400 | -0.10588100 |
| H  | 2.04574200  | -0.64703600 | -1.06433200 |
| Pd | -0.74637100 | -0.09584300 | -0.01052400 |

l1.32

|    |             |             |             |
|----|-------------|-------------|-------------|
| C  | 1.20265200  | 0.76291100  | -0.02637900 |
| O  | 2.27602600  | 0.22250200  | 0.01098100  |
| H  | 1.04388700  | 1.84796600  | -0.08371500 |
| O  | -1.69029000 | 0.98828100  | -0.09339600 |
| H  | -1.61735300 | 1.52394800  | 0.70248400  |
| Pd | -0.24626800 | -0.38338400 | 0.00432200  |

l1.33

|    |             |             |             |
|----|-------------|-------------|-------------|
| C  | -1.60863000 | -0.02127300 | 0.00000800  |
| O  | -2.73980600 | 0.11384900  | -0.00005900 |
| H  | 0.11273000  | 1.41814100  | -0.00009300 |
| O  | 2.19652400  | 0.03452700  | -0.00013600 |
| H  | 2.55411700  | 0.92460100  | 0.00034400  |
| Pd | 0.24633000  | -0.07395900 | 0.00002700  |

l1.34

|    |             |             |             |
|----|-------------|-------------|-------------|
| C  | -1.62623700 | 0.00000900  | 0.00597900  |
| O  | -2.78201700 | -0.00003700 | 0.00233800  |
| H  | 2.75373700  | 0.76838100  | 0.31280100  |
| O  | 2.33371000  | -0.00005900 | -0.08648900 |
| H  | 2.75394600  | -0.76822400 | 0.31291800  |
| Pd | 0.17035200  | 0.00001200  | 0.00025300  |

l1.41b

|    |             |             |             |
|----|-------------|-------------|-------------|
| C  | -1.11916400 | -0.11620700 | -0.00000600 |
| O  | -1.59222200 | -1.23195900 | -0.00000900 |
| O  | -1.94328300 | 0.95194600  | -0.00001100 |
| H  | -1.39116400 | 1.74259200  | -0.00000700 |
| Pd | 0.77674700  | -0.00699500 | 0.00000400  |
| H  | 0.65982500  | 1.51652100  | 0.00004000  |

TS1.11

|   |            |             |             |
|---|------------|-------------|-------------|
| C | 1.93990500 | -0.28755800 | 0.27138500  |
| O | 2.71651000 | 0.58233700  | -0.09536800 |
| H | 2.13725900 | -0.83059200 | 1.20946100  |

|          |             |             |             |
|----------|-------------|-------------|-------------|
| O        | 0.89178500  | -0.70681800 | -0.37759100 |
| H        | -0.36444000 | 1.39522200  | -0.19457900 |
| Pd       | -0.91910000 | 0.04688200  | 0.02479300  |
| TS1.12a  |             |             |             |
| C        | 1.93990500  | -0.28755800 | 0.27138500  |
| O        | 2.71651000  | 0.58233700  | -0.09536800 |
| H        | 2.13725900  | -0.83059200 | 1.20946100  |
| O        | 0.89178500  | -0.70681800 | -0.37759100 |
| H        | -0.36444000 | 1.39522200  | -0.19457900 |
| Pd       | -0.91910000 | 0.04688200  | 0.02479300  |
| TS1.12b* |             |             |             |
| C        | 1.70785500  | 0.10904300  | -0.00004100 |
| O        | 0.98391600  | 1.06196700  | -0.00009500 |
| H        | 0.36123400  | -1.27332000 | -0.00051900 |
| O        | 2.69341200  | -0.51082400 | 0.00011500  |
| H        | -1.88095100 | 1.09594400  | 0.00059300  |
| Pd       | -0.82926200 | -0.10621800 | 0.00000000  |
| TS1.14*  |             |             |             |
| H        | 1.46634003  | 0.15660029  | 0.00000000  |
| H        | -1.46634003 | -1.05417688 | 0.00000000  |
| Pd       | -0.00000000 | 0.01951253  | 0.00000000  |
| TS1.21   |             |             |             |
| C        | 1.76152100  | -0.06875300 | 0.00368700  |
| O        | 2.75732600  | -0.78228300 | -0.00281800 |
| H        | 0.75830900  | -0.68612800 | 0.01745400  |
| O        | 1.63730900  | 1.18039300  | -0.00025200 |
| H        | -0.19863800 | 1.16703000  | -0.00227900 |
| Pd       | -1.00621500 | -0.07072300 | -0.00027700 |
| TS1.31   |             |             |             |
| C        | -1.20676800 | -0.22169300 | 0.42114300  |
| O        | -2.03659100 | -0.70172900 | -0.30533100 |
| H        | -1.34937100 | -0.00525100 | 1.48876300  |
| O        | -0.54312400 | 1.57422500  | 0.02061300  |
| H        | -0.80948100 | 1.72282600  | -0.89432600 |
| Pd       | 0.65298200  | -0.16016000 | -0.01833800 |
| TS1.32   |             |             |             |
| C        | -1.33137300 | 0.12720900  | 0.38436900  |
| O        | -2.20672000 | 0.47931400  | -0.35125100 |
| H        | -1.42832500 | 0.08262900  | 1.48488600  |
| O        | 1.25543600  | 1.27658700  | 0.18229500  |
| H        | 0.89831900  | 1.89216100  | -0.46474800 |
| Pd       | 0.34294100  | -0.49689900 | -0.13427600 |
| TS1.33   |             |             |             |
| C        | -1.60857900 | 0.05721700  | 0.00304600  |

|    |             |             |             |
|----|-------------|-------------|-------------|
| O  | -2.72378500 | 0.30990300  | -0.00017700 |
| H  | 0.87233400  | 1.22740700  | -0.08716800 |
| O  | 2.19212000  | 0.37208100  | -0.10766900 |
| H  | 2.50469800  | 0.57883900  | 0.78061400  |
| Pd | 0.22886400  | -0.16533500 | 0.00328400  |

TS1.40a

|    |             |             |             |
|----|-------------|-------------|-------------|
| C  | 1.16382700  | 0.12893400  | 0.31191500  |
| O  | 1.58876700  | 1.20582100  | -0.13113600 |
| O  | 1.76238200  | -1.06549900 | -0.03771800 |
| H  | 2.38912300  | -0.86439200 | -0.74707000 |
| Pd | -0.80139500 | -0.02293300 | -0.02417600 |
| H  | 0.68289200  | 0.02311300  | 1.33852000  |

TS1.40b

|    |             |             |             |
|----|-------------|-------------|-------------|
| O  | -1.83749900 | -0.98865900 | -0.17805500 |
| H  | -1.45955300 | -1.76860600 | 0.24426200  |
| Pd | 0.79072300  | -0.02233200 | -0.02004400 |
| H  | -0.74359500 | -0.01088200 | 1.33474800  |
| C  | -1.17839900 | 0.13414000  | 0.29163600  |
| O  | -1.54996400 | 1.23890200  | -0.12279700 |

TS1.41a

|    |             |             |             |
|----|-------------|-------------|-------------|
| C  | 1.11249800  | -0.39010200 | 0.00199500  |
| O  | 2.19683000  | -0.77305400 | 0.00120200  |
| O  | 0.82748100  | 1.51484000  | -0.11216200 |
| H  | 0.98824300  | 1.81158800  | 0.79243700  |
| Pd | -0.66725800 | -0.08401400 | 0.00095700  |
| H  | -1.16385500 | -1.54063900 | 0.03927400  |

TS1.41b

|    |             |             |             |
|----|-------------|-------------|-------------|
| C  | -1.19934600 | -0.06637900 | -0.00000600 |
| O  | -1.73960300 | -1.14292000 | -0.00000500 |
| O  | -1.61997900 | 1.14744300  | -0.00001200 |
| H  | -0.35028900 | 1.53466900  | 0.00002000  |
| Pd | 0.73391100  | -0.06070500 | 0.00000200  |
| H  | 0.66312500  | 1.61986300  | 0.00007000  |

TS1.41c

|    |             |             |            |
|----|-------------|-------------|------------|
| C  | -0.51733500 | -1.03443300 | 0.00000000 |
| O  | -1.28422000 | -1.90136400 | 0.00000000 |
| O  | 1.28998200  | -1.58491900 | 0.00000000 |
| H  | 1.75977900  | -2.43953200 | 0.00000000 |
| Pd | 0.00000000  | 0.79661600  | 0.00000000 |
| H  | 1.29814000  | -0.10793200 | 0.00000000 |

PdCO routes:

l1.51

|   |            |             |            |
|---|------------|-------------|------------|
| C | 2.53109900 | 0.15130500  | 0.00003600 |
| O | 1.75617900 | -0.79341300 | 0.00001800 |

|         |             |             |             |
|---------|-------------|-------------|-------------|
| H       | 3.60887900  | 0.01294500  | 0.00010300  |
| O       | 2.18038100  | 1.41237600  | -0.00002000 |
| H       | 1.19002200  | 1.44500000  | -0.00006100 |
| Pd      | -0.31743500 | -0.33105300 | -0.00001100 |
| C       | -2.02653300 | 0.32209000  | -0.00000600 |
| O       | -3.08959800 | 0.74730300  | 0.00004000  |
| l1.52a  |             |             |             |
| C       | 2.57874400  | 0.41311400  | -0.00000800 |
| O       | 3.70392700  | -0.00974400 | -0.00029900 |
| H       | 2.35523400  | 1.48964400  | 0.00013300  |
| O       | 1.50157900  | -0.35616600 | 0.00018800  |
| H       | -0.47314800 | 1.40274400  | 0.00072400  |
| Pd      | -0.40091600 | -0.09722400 | 0.00005700  |
| C       | -2.25416900 | 0.05805400  | -0.00012000 |
| O       | -3.37893200 | 0.21002400  | -0.00022900 |
| l1.52b* |             |             |             |
| C       | 2.55307400  | 0.08659200  | 0.00003500  |
| O       | 1.73584600  | -0.75737400 | -0.00005400 |
| H       | 0.11856900  | 1.40094300  | -0.00106500 |
| O       | 3.39727300  | 0.86757700  | 0.00018700  |
| H       | -0.91281500 | -1.69003000 | 0.00087800  |
| Pd      | -0.37150500 | -0.16516300 | -0.00006100 |
| C       | -2.12098700 | 0.29902000  | 0.00008800  |
| O       | -3.22175000 | 0.58641000  | 0.00015100  |
| l1.53a  |             |             |             |
| H       | 0.00000000  | 0.39442100  | 2.27824200  |
| H       | 0.00000000  | -0.39442100 | 2.27824200  |
| Pd      | 0.00000000  | 0.00000000  | 0.51451700  |
| C       | 0.00000000  | 0.00000000  | -1.36534500 |
| O       | 0.00000000  | 0.00000000  | -2.50402500 |
| l1.53b* |             |             |             |
| H       | 0.00000000  | 1.62607600  | 0.50716700  |
| H       | 0.00000000  | -1.62607600 | 0.50716700  |
| Pd      | 0.00000000  | 0.00000000  | 0.55569500  |
| C       | 0.00000000  | 0.00000000  | -1.24860400 |
| O       | 0.00000000  | 0.00000000  | -2.38558200 |
| l1.71   |             |             |             |
| C       | 0.15007300  | 1.57577600  | 0.23663600  |
| O       | -0.67884300 | 2.28556600  | -0.20859000 |
| H       | 1.00862800  | 1.87436200  | 0.85348600  |
| O       | 2.24448600  | -0.34572800 | 0.01526900  |
| H       | 2.64711600  | -0.11363000 | -0.82607700 |
| Pd      | 0.30281100  | -0.38011100 | -0.00108900 |
| C       | -1.56857700 | -0.59887900 | 0.01834100  |

|         |             |             |             |
|---------|-------------|-------------|-------------|
| O       | -2.69989700 | -0.70696700 | 0.00492500  |
| l1.72   |             |             |             |
| C       | -1.91758500 | -0.27216600 | 0.00001600  |
| O       | -3.03821600 | -0.42638700 | 0.00015800  |
| O       | 0.21651400  | 1.89452500  | 0.00004100  |
| H       | -0.62471700 | 2.35596200  | 0.00001900  |
| Pd      | -0.02043800 | -0.10763400 | -0.00006300 |
| H       | -0.08396100 | -1.66191100 | -0.00013000 |
| C       | 1.91408800  | -0.32810400 | 0.00002200  |
| O       | 3.03042700  | -0.48579600 | 0.00015000  |
| l1.73   |             |             |             |
| C       | -1.75981300 | -0.69408300 | 0.00771000  |
| O       | -2.73058900 | -1.29567300 | 0.02788800  |
| O       | -0.00011600 | 2.51938900  | -0.05884200 |
| H       | -0.76644900 | 2.95859300  | 0.31672200  |
| Pd      | 0.00000600  | 0.06490700  | -0.01524700 |
| C       | 1.75986200  | -0.69399100 | 0.00771200  |
| O       | 2.73066600  | -1.29553700 | 0.02789100  |
| H       | 0.76621000  | 2.95868600  | 0.31662600  |
| l1.81b  |             |             |             |
| C       | 2.17614500  | 0.05421000  | -0.00006000 |
| O       | 3.30652300  | -0.02637700 | 0.00004300  |
| O       | -2.78065300 | -0.74176700 | 0.00026700  |
| H       | -2.44592800 | -1.64448200 | 0.00037800  |
| Pd      | 0.22052800  | -0.03677100 | -0.00004400 |
| H       | 0.23273000  | -1.57603100 | 0.00019300  |
| C       | -1.73342300 | 0.07640400  | 0.00005600  |
| O       | -1.84929800 | 1.28418400  | -0.00012300 |
| TS1.51  |             |             |             |
| C       | 2.57993600  | -0.03779800 | 0.29555100  |
| O       | 3.11441500  | 0.97815800  | -0.06687200 |
| H       | 2.96650500  | -0.63196300 | 1.13600100  |
| O       | 1.51886800  | -0.59463500 | -0.27691900 |
| H       | -0.67507800 | -0.66564500 | 1.32240400  |
| Pd      | -0.34921100 | -0.16521800 | -0.05220700 |
| C       | -2.14107000 | 0.27857100  | 0.01852000  |
| O       | -3.24089700 | 0.54809900  | 0.10112900  |
| TS1.52a |             |             |             |
| C       | 2.31014900  | 0.39851800  | 0.00004200  |
| O       | 3.42339100  | 0.79749200  | -0.00015100 |
| H       | 1.40661100  | 1.38355200  | 0.00011500  |
| O       | 1.67494700  | -0.68120100 | 0.00016900  |
| H       | 0.41040900  | 1.12571000  | 0.00006300  |
| Pd      | -0.40607400 | -0.32880200 | -0.00000300 |

|          |             |             |             |
|----------|-------------|-------------|-------------|
| C        | -2.10942600 | 0.38884200  | -0.00005200 |
| O        | -3.14108100 | 0.87014500  | -0.00001700 |
| TS1.52b* |             |             |             |
| C        | -2.15372600 | 0.25582500  | 0.00003200  |
| O        | -1.72576000 | -0.87764100 | -0.00000200 |
| H        | -0.61913300 | 1.18407300  | -0.00006700 |
| O        | -2.97990300 | 1.07546600  | 0.00001200  |
| H        | 1.06362900  | -1.61626500 | 0.00022800  |
| Pd       | 0.28974300  | -0.23262600 | -0.00001700 |
| C        | 2.01162500  | 0.36961300  | 0.00007800  |
| O        | 3.09065400  | 0.72472100  | -0.00001300 |
| TS1.61a  |             |             |             |
| C        | 2.33472100  | 0.35395000  | 0.00041000  |
| O        | 3.36209400  | -0.20361800 | 0.00203000  |
| H        | 1.27008000  | -0.81224200 | 0.00042400  |
| O        | 1.72046400  | 1.41385400  | -0.00151400 |
| H        | 0.35293300  | 0.92319500  | -0.00278300 |
| Pd       | -0.40634000 | -0.46095500 | -0.00043400 |
| C        | -2.12299300 | 0.34041900  | 0.00028600  |
| O        | -3.10777300 | 0.90561000  | 0.00175200  |
| TS1.71   |             |             |             |
| C        | 1.09058300  | 1.13800500  | 0.41730900  |
| O        | 1.29730600  | 2.02020000  | -0.32918800 |
| H        | 1.38213400  | 1.03787300  | 1.46631800  |
| O        | 1.90172400  | -0.87906000 | 0.06815800  |
| H        | 2.31244300  | -0.86982300 | -0.80311700 |
| Pd       | -0.04587400 | -0.47600500 | -0.02823000 |
| C        | -1.80704000 | 0.16415000  | 0.00765200  |
| O        | -2.85973200 | 0.59826500  | 0.02173400  |
| TS1.72   |             |             |             |
| C        | 1.92360500  | -0.32887300 | 0.08008200  |
| O        | 2.89824400  | -0.79569500 | 0.42193200  |
| H        | -0.95340100 | -1.21850600 | -1.14323300 |
| O        | -0.86488600 | 1.87285500  | 0.43840400  |
| H        | -0.25730000 | 2.30702000  | 1.04383100  |
| Pd       | 0.00735200  | 0.20612600  | -0.23252100 |
| C        | -1.44795300 | -0.94052000 | -0.11756800 |
| O        | -2.28103300 | -1.44640100 | 0.51719700  |
| TS1.73   |             |             |             |
| C        | -1.73643100 | 0.47464200  | 0.00359300  |
| O        | -2.78636200 | 0.91294700  | 0.01279200  |
| H        | -0.41789400 | -1.83449700 | -0.05964900 |
| O        | 1.13016300  | -2.04956400 | -0.08264600 |
| H        | 1.10585100  | -2.53968700 | 0.74488400  |



|         |             |             |             |
|---------|-------------|-------------|-------------|
| Pd      | -0.01831700 | -0.32490300 | -0.00567700 |
| C       | 1.31727200  | 1.30754900  | 0.00220200  |
| O       | 1.98989400  | 2.21494100  | 0.01249800  |
| TS1.80  |             |             |             |
| C       | -2.21516100 | 0.02548700  | 0.02236400  |
| O       | -3.33027500 | 0.12949500  | 0.19950500  |
| O       | 2.37567500  | 1.12870500  | 0.02865600  |
| H       | 3.32538900  | 0.94458000  | -0.05803900 |
| Pd      | -0.26099700 | -0.04875900 | -0.10482600 |
| H       | 0.39161300  | 0.38480900  | 1.23609600  |
| C       | 1.74994300  | -0.06509500 | 0.11949100  |
| O       | 2.33961900  | -1.11430600 | 0.12094200  |
| TS1.81a |             |             |             |
| C       | -2.07309400 | 0.10651100  | 0.02432900  |
| O       | -3.20300400 | 0.17889900  | 0.05055500  |
| O       | 1.34571600  | 1.40414600  | -0.11586400 |
| H       | 1.61967300  | 1.82092800  | 0.71085900  |
| Pd      | -0.16727000 | -0.17368300 | -0.01772900 |
| H       | -0.55283900 | -1.65263900 | -0.03366200 |
| C       | 1.78485900  | -0.22411000 | -0.00670800 |
| O       | 2.90191400  | -0.51720300 | 0.06938700  |
| TS1.81b |             |             |             |
| C       | -2.19851100 | 0.08804700  | -0.00004600 |
| O       | -3.32987300 | 0.07113800  | -0.00010300 |
| O       | 2.48537700  | -0.89664900 | 0.00014100  |
| H       | 1.34000100  | -1.50879400 | 0.00016100  |
| Pd      | -0.17607600 | -0.05691500 | 0.00000900  |
| H       | 0.31406100  | -1.70672100 | 0.00013700  |
| C       | 1.81092300  | 0.17083000  | 0.00001600  |
| O       | 1.94086700  | 1.36055400  | -0.00010700 |
| TS1.81c |             |             |             |
| C       | 1.79154800  | -0.12581000 | -0.02135000 |
| O       | 2.84380400  | -0.60549800 | 0.18139100  |
| O       | 1.73509500  | 1.44416700  | -0.10756300 |
| H       | 2.42877800  | 1.89088300  | 0.41250900  |
| Pd      | -0.25621000 | -0.29284700 | -0.05076800 |
| H       | 0.33739000  | 1.21825700  | 0.09466300  |
| C       | -2.12493100 | 0.11401200  | 0.05195300  |
| O       | -3.20142700 | 0.46540900  | 0.13173700  |
